# Supplementary material for: Common and divergent gene regulatory networks control injury-induced and developmental neurogenesis in zebrafish retina
Source: PubMed Central journal article supplement (PMC10733277; doi:10.1038/s41467-023-44142-w), 2023-12-20
Supplement: 41467_2023_44142_MOESM2_ESM.pdf [file 41467_2023_44142_MOESM2_ESM.pdf]

Common and divergent gene regulatory networks control injury-induced and developmental neurogenesis in zebrafish retina.

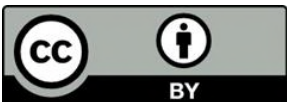

**Open Access** This file is licensed under a Creative Commons Attribution 4.0 International License, which permits use, sharing, adaptation, distribution and reproduction in any medium or format, as long as you give appropriate credit to the original author(s) and the source, provide a link to the Creative Commons license, and indicate if changes were made. In the cases where the authors are anonymous, such as is the case for the reports of anonymous peer reviewers, author attribution should be to 'Anonymous Referee' followed by a clear attribution to the source work. The images or other third party material in this file are included in the article's Creative Commons license, unless indicated otherwise in a credit line to the material. If material is not included in the article's Creative Commons license and your intended use is not permitted by statutory regulation or exceeds the permitted use, you will need to obtain permission directly from the copyright holder. To view a copy of this license, visit <http://creativecommons.org/licenses/by/4.0/>.

## **REVIEWER COMMENTS**

### **Reviewer #1 (Remarks to the Author):**

Müller glia in the zebrafish retina respond to injury by generating all retinal cell types. Different injury paradigms lead to the preferential loss of different retinal cell types. This offers the unique possibility to assess whether the reaction of Müller glia also preferentially replaces the lost cell type(s) over the others and which gene expression/regulatory elements are responsible for any differences. Furthermore, they address whether regenerative neurogenesis recapitulates developmental neurogenesis and find it doesn't. The authors present a thorough analysis of the regulation of gene expression and regulatory elements and discover a number of interesting functional interactions. Most importantly, *mmp9* is shown to regulate the generation of amacrine and ganglion cell relative to photoreceptors. A number of potential regulators of regenerative neurogenesis are touched upon, but not further investigated (e.g. *Il1beta*).

Overall, this is a carefully presented analysis that will be useful for a number of fields in which neurogenesis and cell fate decisions are investigated. However, the results are not always stringently bound to the biological model(s) and are overall a bit hard to follow because of that. This limits the broader accessibility and attractiveness of the data presented here.

In particular, a visualisation of the proposed cell fate transition and decision points (as first described from line 59) would aid understanding of the (in principal) strong conceptual framework.

major:

The author state that, different from development, neurons born after injury are not eliminated over time (e.g. in line 82, also line 534f). This is not conclusively shown or referenced. Furthermore, this statement seems to contradict their statement in line 132f that speculates that removal of "excess immature neurons" might be happening.

In the section line 127 - 141 it remains unclear whether NMDA significantly damages photoreceptors or not.

In line 146, no difference in the number of EdU labelled neurons is reported to occur between 7DR and 21DR - could this be a balance between cell proliferation and cell death? What is the evidence for/against this possibility?

The authors state that there they have not found genes for cilia in their expression profile, apart from *FoxJ1a*, which regulates neurogenesis in the retina in the present study. Cultured MGs have been described in mammals (PMID: 25504432), this should be discussed here.

The section around line 169 seems to suggest a replacement of lost neurons between 60 hours post light damage, when ONL shows the most pronounced loss of nuclei and 72 hours. Is 12 hours a reasonable time for the replenishment of ONL nuclei and what is the evidence for that?

Section starting line 332: there's a strong \*down\*regulation of several genes that are not discussed, e.g. *TNFB*, *tnfsf12*, *stat1a*, while *Il11b* is upregulated at the 36 hour time point - these should be discussed more clearly.

Discussion: Discussions of the results in the first section (page 13) should much more clearly be related back to the model. Schematics clearly illustrating which cell types are lost in each lesion model and which are replaced via which steps are needed to aid interpretation of the results (also would help statements in lines 530 ff).

lines 570ff: the authors speculate, based on their data from the *mmp9* mutant that *mmp9* might control the maturation of *il1b* and that this may mediate some of the observed phenotype. This is

a very testable hypothesis, since the activation of il1b can be inhibited by caspase 1 inhibition.

lines 582: the distinct progenitors described here should be highlighted in the figures.

minor:

line 6: Hitchcock (small i)

line 112: that HAD incorporated

line 115: define "extensive"

line 131: is the "slight decrease" reported here statistically significant?

line 307: "inhibiting GENERATION OF inner retinal neurons"

line 448: "with either uninjected or injected..." there's a grammar problem here

line 508: "that continue to proliferate"

line 529: "amacrines" - jargon

## **Reviewer #2 (Remarks to the Author):**

Lyu et al., 2023

The work by Lyu et al., 2023 provides a significant advancement in our understanding of the molecular mechanisms regulating retina regeneration in zebrafish upon NMDA and light lesions. The authors use a combination of single cell-, single nucleus- and ATAC-sequencing to detect gene expression changes that underlie the two different lesion paradigms, and between regeneration and retinal development. All retinal neurons, with the exception of horizontal cells, are regenerated in both the light lesioned and the NMDA retinae, hence showing that the two paradigms are not as specific as previously thought in terms of ablating distinct retinal neuronal types. Nevertheless, a biased differentiation of MGPCs towards photoreceptors in the light lesioned retina and towards inner neurons in the NMDA-lesioned retina is apparent. Moreover, the authors suggest that matrix metalloprotease Mmp9 may promote generation of inner retinal neurons as compared to photoreceptors. They also point out shared and distinct gene expression between regeneration and development of the retina. Finally, they provide evidence that the transcription factor Foxj1a may be necessary for neuronal regeneration of the adult retina, but not during development.

This reviewer commends the authors for the huge effort to provide this overview of the sc-gene expression changes underlying retina regeneration using several, cutting-edge technologies. Specifically, the manuscript provides a thorough description of the later events of retina regeneration (up to 21 days post-lesion), which have so far been less well described and understood. This comprehensive study of retina regeneration in zebrafish is likely to be of lasting importance in the field, and will support generation of future hypotheses and functional studies in the field. recommends some revision of this manuscript. I have the following comments and suggestions for revisions.

### **MAJOR COMMENTS**

1. Although the manuscript is of a clear and significant importance for the understanding of retina regeneration in zebrafish, the flow of the text and figures is difficult to follow. The readability of the manuscript is likely to improve if the frequent mismatches between the main text and the figures, and with their captions, are corrected.

1a. Specifically, the flow of the text should better follow the order of the figures, to avoid frequent jumps between figure panels. For example, the authors describe first figure 2D, then jump back to describe figure 2C (compare line 208 to line 218). This applies to other figures in the manuscript: first figure S5C/D and then S5A, B, first figure 5E/H and then a jump to figure 6 G,H (lines 413-414).

1b. There are several mismatches between text and related figures, specifically in lines: 229-231; 234-237, 255-258, 258-260, 274-276; 295-295; also, what does the magenta color of the bar plots in figure 3E indicate? The plot looks unclear and difficult to relate to the text. In general, the authors may want to be more precise and exhaustive in their description of figure panels, at least for those mentioned in the highlighted lines. Line 304-figure panel S5H seems to support the opposite of what is stated in this line. There is a severe mismatch between the entire Figure 3 and its caption: panels described in the caption are not matched in the figure, which makes it very hard to understand.

1c. In Figure 1G there is no indication of the uninjured control, whereas in Figure 1J it is not clear what the control for NMDA injections is (uninjected? Vehicle injected?). The uninjured control is also missing from Figure S2.

1d. The nomenclature in Figure 2C does not match the nomenclature in Figure 2D. In Figure 2C the authors list retinal ganglion cells, amacrine cells, bipolar cells, cones, rods, while in Figure 2D the word "precursor" is added to the previous names. The authors should provide a clear definition of what they designate as a "precursor" (see point 2).

1e. Figure panels 4C and 4D are not clearly explained: there is no legend for the colors of the bar plots, as well as for the symbols (what does the circle stand for? And the square? What do E, G, P stand for? Please, specify. The same applies to Figure 6C, 6E, 6F). The way Figure 4F is described is highly unclear to me: lines 338-340. The same applies to figure 6F.

2. The nomenclature used in the manuscript is sometimes confusing. This applies specifically to the terms "resting" Müller glia, "reprogrammed" Müller glia, "activated" Müller glia and "precursor".

2a. How does a reprogrammed MG differ from an activated one? Activated MG is defined in Hoang et al., 2020, but in the present manuscript it seems to be used interchangeably with the term "reprogrammed" MG. How do the two cell populations differ (If they do)?

2b. Please, define what a precursor is in the context of retina regeneration: from the manuscript, it appears that "precursor" defines an immature or differentiating neuron. However, please note that in zebrafish retina development the word precursor refers to specific neuronal progenitors that undergo the last one or two mitoses to generate a specific class of neurons (e.g., horizontal cell precursors described in Godinho et al., 2007; cone precursors described in Suzuki et al., 2013; all reviewed in Amini et al., 2018).

3. Lack of evidence for statements in:

3a. Line 66: is there any published evidence that the excess of regenerated neurons does not integrate into the extant retinal circuit ?

3b. Lines 344-346: it is hard to find the info in the cited table;

3c. Lines 353-354: there is no evidence shown for the implication stated in these lines - maybe move to the discussion section ?

3d. Lines 348-354 significantly interrupt the flow of the text before and after, and the corresponding figure 4G does not fit well with the rest of the panels in figure 4.

4. The authors do not discuss the absence of horizontal cells and their precursors in their lesioned retinae, which are reported however by Lahne et al., 2021 and Celotto et al., 2023. *onecut1*, which is necessary for HC development and expressed strongly in HC precursors (Celotto et al., 2023), appears as a differentially upregulated motif in Figure 2H. How do the authors explain this upregulation, in light of the claimed absence of regenerated HCs and HC precursors upon injury?

5. Figure S7G and line 496: In the image shown for the *foxj1a* mutant, lamination of the retina

looks disrupted, in contrast to what is stated in the text (line: 496). The retinae in the mutant look smaller, and plexiform layers are hardly distinguishable, compared to controls. Also, why is lamination delayed in the *foxj1a* mutant, compared to the control: did the authors check whether the *foxj1a* mutant retina 'catches up' and has developed correctly at time points later than 96 hpf?

6. It is unclear what the birth order of retinal neurons is during development: why do lines 576-577 seem to contradict lines 209-2011?

7. Lines 606-607: Please, provide a different reference for these lines. The cited paper Nagashima et al., 2013 does not resolve the issue of symmetry or asymmetry of the MGPC division. Nagashima et al. showed that Müller glia likely undergo one asymmetric division within 42 hpl with respect to fate, generating a self-renewed MG and a MGPC. They did not examine whether the MGPC itself divides asymmetrically or symmetrically, nor does there appear to be any convincing evidence for an asymmetric division of MGPCs from the published literature.

#### MINOR COMMENTS

8. Please, kindly revise the font of the gene names throughout the manuscript. The gene names should be indicated in italics, which does not always seem to be the case in the current version of the manuscript. There is a slight typo in the Methods: z stacks are measured as  $\mu\text{m}$  and not as  $\mu\text{M}$ .

9. Did the authors perform a TUNEL staining to look for signs of unspecific cell death upon light lesion as well as upon NMDA lesion?

10. Please, kindly explain the time points chosen for the NMDA lesion (7DR and 14 DR) and those chosen for the light lesion (7DR, 14 DR and 21 DR) in figure 1A, 1E and 1G. Why did the authors examine also the 21 DR time point in the light lesion, but not in the NMDA lesion? Please, also revise the scheme in Figure 1E: there is no indication of the 21 DR time point.

11. Lines 287-293: The authors may want to expand the description of Figure 3. Please, clearly indicate that HuC/D is a label of RGCs and ACs: this might be obvious for a retina expert, but will be less obvious for readers who are not familiar with the distinct labels of retinal neurons.

12. Line 290: how do you know that they are EdU-positive neurons and not EdU-positive cells?

13. Line 304 appears to be redundant ("in the production of the generation...").

14. Line 306: the authors may want to revise the sentence. The way it is written it suggests that these "initial factors" inhibit the function of inner neurons, whereas they might inhibit the generation of inner neurons.

15. Lines 344-346: this information is not easily accessible in the current table format. In general, I suggest to revise the nomenclature of the tables (ST3, ST4...), because in the current manuscript version each "table" corresponds to an Excel file containing, in fact, several tables.

16. Line 350: Figure S3 is actually a general overview, and does not specifically refer to microglia only. Also, not all the microglia markers listed in the text are visible in the cited Figure S3, only mpeg1.1.

17. It is not clear why the authors sequenced the whole embryo heads (line 366) – please explain.

### **Reviewer #3 (Remarks to the Author):**

In the manuscript, the authors investigated the molecular process of retina regeneration in zebrafish in both light damage and NMDA models at single cell resolution. By comparing the two damage models and normal development process, the authors observed that the regeneration process is similar but distinct between the two damage models and also distinct from normal development process. In addition, the impact of two key factors, Mmp9 and foxj1a, on the regeneration have been examined. The results suggest that Mmp9 plays an important role in repressing regeneration of AC and RGC. In addition, knock down of Foxj1a reduces the number of regenerative neurons. I would like to congratulate the authors for generating such a significant resource and the new insights of the molecular process of retina regeneration in zebrafish. The design of the study is very thorough, and the manuscript is well written. My specific comments are the following:

1. No regeneration of horizontal cells are observed in this study. I am wondering if this is due to no degeneration of horizontal cell in the LD and NMDA damage model.
2. Does Mmp9 affect the normal development of the retina? Is higher AC/RGC to photoreceptor ratio observed in the Mmp9 mutant?
3. It seems that MG activation is faster in the LD model than the NMDA model. Furthermore, given the heterogeneity of MG and derived cells in any given time points, it might be useful to try to take this into account by calculating and correcting pseudotime during DEG and DAR analysis to exclude DEGs between two models due to phase shift.
4. "When examining the MG-to-MGPC branch across the two damage models, noticeable similarities are present. However, unique DEGs and DARs exist between them. The LD model exhibits a heightened neurogenic signal, while the NMDA model emphasizes a more robust inflammatory response pathway. From these observations, the authors suggest a hypothesis: MGPCs from these two damage models are in unique states, leading to varying proportions of retinal neurons being produced. Yet, this difference might merely be a reflection of environmental variations due to different cell type degenerations, rather than distinct MG regeneration pathway's choice. How can we differentiate between these two models?"
5. During typical development, the cell type that a progenitor cell differentiates into is predominantly governed intrinsically. In the context of regeneration, MGPCs differentiate into cell types degenerated. How might MGPCs detect environmental cues and make corresponding differentiation choices? Could the author provide some speculation on this?
6. Based on the data, is foxj1a required for MG activation or subsequent MGPC proliferation and differentiation?
7. Considering the extensive and complex dataset presented, a summarizing model figure highlighting the key findings at the end would be beneficial.

1 We thank the Reviewers for their detailed and constructive comments. We have  
2 addressed each individual point raised. Our responses are listed below [in blue font](#):  
3  
4

## 5 **REVIEWER COMMENTS**

6

7 Reviewer #1 (Remarks to the Author):  
8

9 Müller glia in the zebrafish retina respond to injury by generating all retinal cell types.  
10 Different injury paradigms lead to the preferential loss of different retinal cell types. This  
11 offers the unique possibility to assess whether the reaction of Müller glia also  
12 preferentially replaces the lost cell type(s) over the others and which gene  
13 expression/regulatory elements are responsible for any differences. Furthermore,  
14 they address whether regenerative neurogenesis recapitulates developmental  
15 neurogenesis and find it doesn't. The authors present a thorough analysis of the  
16 regulation of gene expression and regulatory elements and discover a number of  
17 interesting functional interactions. Most importantly, mmp9 is shown to regulate the  
18 generation of amacrine and ganglion cell relative to photoreceptors. A number of  
19 potential regulators of regenerative neurogenesis are touched upon, but not further  
20 investigated (e.g. Il1beta).  
21

22 Overall, this is a carefully presented analysis that will be useful for a number of fields in  
23 which neurogenesis and cell fate decisions are investigated. However, the results are  
24 not always stringently bound to the biological model(s) and are overall a bit hard to  
25 follow because of that. This limits the broader accessibility and attractiveness of the  
26 data presented here.  
27

28 In particular, a visualisation of the proposed cell fate transition and decision points (as  
29 first described from line 59) would aid understanding of the (in principal) strong  
30 conceptual framework.  
31

32 [We thank the Reviewer for his/her overall positive assessment of the manuscript.](#)  
33

34 major:  
35

36 The author state that, different from development, neurons born after injury are not  
37 eliminated over time (e.g. in line 82, also line 534f). This is not conclusively shown or  
38 referenced. Furthermore, this statement seems to contradict their statement in line 132f  
39 that speculates that removal of "excess immature neurons" might be happening.  
40

41 [This conclusion is based on the lack of change in the number of EdU-positive neurons](#)  
42 [over time, following labeling from 60-108 hours post-injury, which corresponds closely to](#)  
43 [the observed peak in MGPC proliferation observed by both scRNA-Seq and](#)  
44 [snRNA/ATAC-Seq analysis \(Fig. 2\). With one exception, we observe no statistically](#)  
45 [significant decrease in EdU incorporation through 14-21 days of recovery post-injury for](#)  
46 [any cell type in any injury model, implying that no EdU-positive cells are eliminated](#)

47 through apoptosis. The one exception is the rather modest reduction in the number of  
48 EdU-labeled rod photoreceptors between 7 and 14 days post-injury, which is referenced  
49 on line 132f. We have modified the text to make this point clearer.

50  
51 In the section line 127 - 141 it remains unclear whether NMDA significantly damages  
52 photoreceptors or not.

53  
54 We identify both TUNEL-positive cells and DAPI-positive cells with pyknotic nuclei in the  
55 INL with light damage, as well as in the photoreceptor layer following NMDA (Fig. S3).  
56 This, combined with the corresponding reduction in the number of DAPI-positive nuclei,  
57 supports the conclusion that these cells are dying.

58  
59 In line 146, no difference in the number of EdU labelled neurons is reported to occur  
60 between 7DR and 21DR - could this be a balance between cell proliferation and cell  
61 death? What is the evidence for/against this possibility?

62  
63 We have quantified the number of brightly-labeled EdU-positive cells in the section.  
64 EdU was administered between 60 and 108 hours (2.5-4.5 days) post-injury. While  
65 both scRNA-Seq and snRNA/ATAC-Seq showed only very low levels of MGPC  
66 proliferation after this time, a small number of neurons are definitely still being  
67 generated between 7 and 21 days post-injury. The Reviewer is correct that we did not  
68 do EdU labeling between 7-21 days, and while new cells may be generated, the finding  
69 that the number of EdU-labeled cells does not change in this period implies that no  
70 substantial removal of newly-generated neurons is taking place.

71  
72 The authors state that there they have not found genes for cilia in their expression  
73 profile, apart from FoxJ1a, which regulates neurogenesis in the retina in the present  
74 study. Cultured MGs have been described in mammals (PMID: 25504432), this should  
75 be discussed here.

76  
77 Muller glia, like virtually every cell type, do indeed possess primary cilia, and we now  
78 cite this reference to emphasize this point. However, Foxj1 and its zebrafish  
79 homologues have been most extensively studied as master transcriptional regulators of  
80 motile multiciliated cells (Stubbs, et al. 2008; Hellman, et al. 2010). Neither Muller glia  
81 nor MGPCs have been observed to be multiciliated, and we likewise do not observe  
82 molecular markers that would suggest that this is the case. This point is now discussed  
83 in more detail in the revised text.

84  
85 The section around line 169 seems to suggest a replacement of lost neurons between  
86 60 hours post light damage, when ONL shows the most pronounced loss of nuclei and  
87 72 hours. Is 12 hours a reasonable time for the replenishment of ONL nuclei and what is  
88 the evidence for that?

89  
90 While some of these DAPI-positive nuclei may indeed be regenerated photoreceptors  
91 cells at 72 hours, it is likely that many of them instead represent progenitors undergoing  
92 interkinetic nuclear migration (Lahne and Hyde 2016), in which progenitors transitioning



93 through the cell cycle migrate apically, divide, and then undergo radial migration in the  
94 basal direction. This is now discussed in the text.  
95

96 Section starting line 332: there's a strong \*down\*regulation of several genes that are not  
97 discussed, e.g. TNFb, tnfsf12, stat1a, while Il11b is upregulated at the 36 hour time  
98 point - these should be discussed more clearly.  
99

100 Tnfb is actually upregulated at 36hrs with similar kinetics to il1b/il11b (Fig. 4G). Tnfsf12  
101 and stat1a are, however, are indeed transiently downregulated following LD at 36hrs,  
102 but upregulated following NMDA injury. This point is now discussed in the text.  
103

104 Discussion: Discussions of the results in the first section (page 13) should much more  
105 clearly be related back to the model. Schematics clearly illustrating which cell types are  
106 lost in each lesion model and which are replaced via which steps are needed to aid  
107 interpretation of the results (also would help statements in lines 530 ff).  
108

109 We now include schematic Figure S9 to summarize the overall findings and address  
110 these points.  
111

112 lines 570ff: the authors speculate, based on their data from the mmp9 mutant that  
113 mmp9 might control the maturation of il1b and that this may mediate some of the  
114 observed phenotype. This is a very testable hypothesis, since the activation of il1b can  
115 be inhibited by caspase 1 inhibition.  
116

117 This is an excellent suggestion, but we believe it is beyond the scope of the current  
118 study. There are four different Caspase-1 paralogues in zebrafish, and both their  
119 substrate specificity and specificity of known Caspase-1 inhibitors in zebrafish remain  
120 uncertain, so even if partial functional rescue was observed, these results would be  
121 difficult to interpret without further functional analysis of IL-1beta processing and  
122 signaling.  
123

124 lines 582: the distinct progenitors described here should be highlighted in the figures.  
125

126 The distinct progenitors described here correspond to postmitotic rod and cone  
127 precursors which has been labeled in red arrow in Figure S4A .  
128

129 minor:  
130

131 line 6: Hitchcock (small i)  
132 line 112: that HAD incorporated  
133 line 115: define "extensive"  
134 line 131: is the "slight decrease" reported here statistically significant?  
135 line 307: "inhibiting GENERATION OF inner retinal neurons"  
136 line 448: "with either uninjected or injected..." there's a grammar problem here  
137 line 508: "that continue to proliferate"  
138 line 529: "amacrines" – jargon

139  
140 [These have been corrected.](#)

141  
142  
143 Reviewer #2 (Remarks to the Author):

144  
145 Lyu et al., 2023

146  
147 The work by Lyu et al., 2023 provides a significant advancement in our understanding of  
148 the molecular mechanisms regulating retina regeneration in zebrafish upon NMDA and  
149 light lesions. The authors use a combination of single cell-, single nucleus- and ATAC-  
150 sequencing to detect gene expression changes that underlie the two different lesion  
151 paradigms, and between regeneration and retinal development. All retinal neurons, with  
152 the exception of horizontal cells, are regenerated in both the light lesioned and the  
153 NMDA retinae, hence showing that the two paradigms are not as specific as previously  
154 thought in terms of ablating distinct retinal neuronal types. Nevertheless, a biased  
155 differentiation of MGPCs towards photoreceptors in the light lesioned retina and towards  
156 inner neurons in the NMDA-lesioned retina is apparent. Moreover, the authors suggest  
157 that matrix metalloprotease Mmp9 may promote generation of inner retinal neurons as  
158 compared to photoreceptors. They also point out shared and distinct gene expression  
159 between regeneration and development of the retina. Finally, they provide evidence that  
160 the transcription factor Foxj1a may be necessary for neuronal regeneration of the adult  
161 retina, but not during development.

162  
163 This reviewer commends the authors for the huge effort to provide this overview of the  
164 sc-gene expression changes underlying retina regeneration using several, cutting-edge  
165 technologies. Specifically, the manuscript provides a thorough description of the later  
166 events of retina regeneration (up to 21 days post-lesion), which have so far been less  
167 well described and understood. This comprehensive study of retina regeneration in  
168 zebrafish is likely to be of lasting importance in the field, and will support generation of  
169 future hypotheses and functional studies in the field. recommends some revision of this  
170 manuscript. I have the following comments and suggestions for revisions.

171  
172 [We thank the Reviewer for his/her positive assessment of the manuscript.](#)

173  
174 MAJOR COMMENTS

175 1. Although the manuscript is of a clear and significant importance for the understanding  
176 of retina regeneration in zebrafish, the flow of the text and figures is difficult to follow.  
177 The readability of the manuscript is likely to improve if the frequent mismatches  
178 between the main text and the figures, and with their captions, are corrected.

179  
180 [We thank the Reviewer for his/her careful reading of the text. Please see below:](#)

181  
182 1a. Specifically, the flow of the text should better follow the order of the figures, to avoid  
183 frequent jumps between figure panels. For example, the authors describe first figure 2D,  
184 then jump back to describe figure 2C (compare line 208 to line 218). This applies to

185 other figures in the manuscript: first figure S5C/D and then S5A, B, first figure 5E/H and  
186 then a jump to figure 6 G,H (lines 413-414).

187  
188 We have reorganized the figures to better reflect the order of description.

189  
190 1b. There are several mismatches between text and related figures, specifically in lines:  
191 229-231; 234-237, 255-258, 258-260, 274-276; 295-295; also, what does the magenta  
192 color of the bar plots in figure 3E indicate? The plot looks unclear and difficult to relate  
193 to the text. In general, the authors may want to be more precise and exhaustive in their  
194 description of figure panels, at least for those mentioned in the highlighted lines. Line  
195 304-figure panel S5H seems to support the opposite of what is stated in this line. There  
196 is a severe mismatch between the entire Figure 3 and its caption: panels described in  
197 the caption are not matched in the figure, which makes it very hard to understand.

198  
199 We have carefully revised both the figures and legends to greater clarity and to correct  
200 any mismatches. We now clearly state that the magenta bar indicates data from *mmp9*  
201 mutant animals.

202  
203 1c. In Figure 1G there is no indication of the uninjured control, whereas in Figure 1J it is  
204 not clear what the control for NMDA injections is (uninjected? Vehicle injected?).The  
205 uninjured control is also missing from Figure S2.

206  
207 Figure 1B represents the PBS-injected, uninjured control for both the light-damage and  
208 NMDA-damage experiments. The purpose of the experiment is to demonstrate how the  
209 number of EdU-labeled cells changes, or not, at different timepoints of recovery from  
210 either LD or NMDA-mediated injury, not compared to the undamaged control. This is  
211 also the case for Fig. S2.

212  
213 1d. The nomenclature in Figure 2C does not match the nomenclature in Figure 2D. In  
214 Figure 2C the authors list retinal ganglion cells, amacrine cells, bipolar cells, cones,  
215 rods, while in Figure 2D the word “precursor” is added to the previous names. The  
216 authors should provide a clear definition of what they designate as a “precursor” (see  
217 point 2).

218  
219 A precursor is an immature postmitotic neuron, as opposed to a progenitor, which is  
220 mitotic. This has now been defined explicitly. Figure 2 has been revised for greater  
221 clarity, as requested.

222  
223 1e. Figure panels 4C and 4D are not clearly explained: there is no legend for the colors  
224 of the bar plots, as well as for the symbols (what does the circle stand for? And the  
225 square? What do E, G, P stand for? Please, specify. The same applies to Figure 6C,  
226 6E, 6F). The way Figure 4F is described is highly unclear to me: lines 338-340. The  
227 same applies to figure 6F.

228  
229 These figures and the corresponding legends and manuscript text have been revised for  
230 greater clarity, as requested.

231  
232 2. The nomenclature used in the manuscript is sometimes confusing. This applies  
233 specifically to the terms “resting” Müller glia, “reprogrammed” Müller glia, “activated”  
234 Müller glia and “precursor”.

235  
236 2a. How does a reprogrammed MG differ from an activated one? Activated MG is  
237 defined in Hoang et al., 2020, but in the present manuscript it seems to be used  
238 interchangeably with the term “reprogrammed” MG. How do the two cell populations  
239 differ (If they do)?

240  
241 A “reprogrammed MG” in this context represents a Muller glia-derived progenitor cell  
242 (MGPCs). We have altered the text throughout to reflect this.

243  
244 2b. Please, define what a precursor is in the context of retina regeneration: from the  
245 manuscript, it appears that “precursor” defines an immature or differentiating neuron.  
246 However, please note that in zebrafish retina development the word precursor refers to  
247 specific neuronal progenitors that undergo the last one or two mitoses to generate a  
248 specific class of neurons (e.g., horizontal cell precursors described in Godinho et al.,  
249 2007; cone precursors described in Suzuki et al., 2013; all reviewed in Amini et al.,  
250 2018).

251  
252 In this context, a precursor is an immature postmitotic neuron, while a progenitor (or  
253 MGPC) is mitotic. This has been defined explicitly in the text.

254  
255 3. Lack of evidence for statements in:

256  
257 3a. Line 66: is there any published evidence that the excess of regenerated neurons  
258 does not integrate into the extant retinal circuit ?

259  
260 There is no direct evidence to this effect. This fact is now stated explicitly.

261  
262 3b. Lines 344-346: it is hard to find the info in the cited table;

263  
264 The relevant supplemental dataset (formerly table) has been revised for clarity.

265  
266 3c. Lines 353-354: there is no evidence shown for the implication stated in these lines -  
267 maybe move to the discussion section ?

268  
269 This has been done.

270  
271 3d. Lines 348-354 significantly interrupt the flow of the text before and after, and the  
272 corresponding figure 4G does not fit well with the rest of the panels in figure 4.

273  
274 We have revised the text for better clarity and smoother narrative flow.

275  
276 4. The authors do not discuss the absence of horizontal cells and their precursors in

277 their lesioned retinæ, which are reported however by Lahne et al., 2021 and Celotto et  
278 al., 2023. *onecut1*, which is necessary for HC development and expressed strongly in  
279 HC precursors (Celotto et al., 2023), appears as a differentially upregulated motif in  
280 Figure 2H. How do the authors explain this upregulation, in light of the claimed absence  
281 of regenerated HCs and HC precursors upon injury?

282  
283 [Onecut family transcription factors have an essential role in promoting cone  
284 photoreceptor specification in mammals \(Lonfat et al. 2021; Emerson et al. 2013\),  
285 although this has not been directly shown in zebrafish. Mammalian cone photoreceptors  
286 arise from \*Onecut/Otx2\*-positive neurogenic progenitors that have the potential to  
287 generate either cones or horizontal cells. Interestingly, we observe neurogenic MGPCs  
288 in zebrafish that express both \*Onecut1/2\* and \*Otx2\*, but do not generate horizontal cells,  
289 raising the possibility that horizontal cell generation might be actively inhibited through  
290 unknown mechanisms in these cells. We discuss this point in the revised manuscript.](#)

291  
292 5. Figure S7G and line 496: In the image shown for the *foxj1a* mutant, lamination of the  
293 retina looks disrupted, in contrast to what is stated in the text (line: 496). The retinæ in  
294 the mutant look smaller, and plexiform layers are hardly distinguishable, compared to  
295 controls. Also, why is lamination delayed in the *foxj1a* mutant, compared to the control:  
296 did the authors check whether the *foxj1a* mutant retina ‘catches up’ and has developed  
297 correctly at time points later than 96 hpf?

298  
299 [Because the morpholino effect is transient, looking at later timepoints will not be a true  
300 indication of the loss of \*foxj1a\* expression, as it is likely to increase after the morpholinos  
301 are lost. The size of the embryos was also much smaller in the morphant than the  
302 control and we are unable to separate the issue of the embryo size and the retina size.](#)

303  
304 [More generally, \*foxj1a\* is broadly expressed in the early embryo, and the morphant  
305 affects the overall size of many organs, including the eye. However, we do not observe  
306 expression of \*foxj1a\* in retinal progenitors or neural precursors in the developing retina,  
307 and no clear effects on overall levels of retinal neurogenesis in morphants.](#)

308  
309 6. It is unclear what the birth order of retinal neurons is during development: why do  
310 lines 576-577 seem to contradict lines 209-2011?

311  
312 [This has been clarified in the revised text.](#)

313  
314 7. Lines 606-607: Please, provide a different reference for these lines. The cited paper  
315 Nagashima et al., 2013 does not resolve the issue of symmetry or asymmetry of the  
316 MGPC division. Nagashima et al. showed that Müller glia likely undergo one asymmetric  
317 division within 42 hpl with respect to fate, generating a self-renewed MG and a MGPC.  
318 They did not examine whether the MGPC itself divides asymmetrically or symmetrically,  
319 nor does there appear to be any convincing evidence for an asymmetric division of  
320 MGPCs from the published literature.

321

322 This is absolutely correct. There is no direct evidence to support either symmetric or  
323 asymmetric patterns of cell division by the MGPCs themselves. We revised the text  
324 accordingly.

325  
326 MINOR COMMENTS

327 8. Please, kindly revise the font of the gene names throughout the manuscript. The  
328 gene names should be indicated in italics, which does not always seem to be the case  
329 in the current version of the manuscript. There is a slight typo in the Methods: z stacks  
330 are measured as  $\mu\text{m}$  and not as  $\mu\text{M}$ .

331  
332 This has been corrected.

333  
334 9. Did the authors perform a TUNEL staining to look for signs of unspecific cell death  
335 upon light lesion as well as upon NMDA lesion?

336  
337 As stated in the response to Reviewer 1, we observe pyknotic nuclei in all cell layers  
338 following both LD and NMDA injury. While these often overlap with TUNEL-positive  
339 cells, we observe substantially more pyknotic cells than TUNEL-positive cells. This is  
340 now shown in Figure S3.

341  
342 10. Please, kindly explain the time points chosen for the NMDA lesion (7DR and 14 DR)  
343 and those chosen for the light lesion (7DR, 14 DR and 21 DR) in figure 1A, 1E and 1G.  
344 Why did the authors examine also the 21 DR time point in the light lesion, but not in the  
345 NMDA lesion? Please, also revise the scheme in Figure 1E: there is no indication of the  
346 21 DR time point.

347  
348 The 21 DR timepoint was also examined in LD simply because we had more LD-treated  
349 animals available, owing to the fact that this procedure does not involve any direct  
350 manipulation of the animals. In any case, no significant difference is observed between  
351 the 14 DR and 21 DR samples for any of the parameters tested. We have revised the  
352 schematic in Figure 1E to include the 21 DR timepoint.

353  
354 11. Lines 287-293: The authors may want to expand the description of Figure 3. Please,  
355 clearly indicate that HuC/D is a label of RGCs and ACs: this might be obvious for a  
356 retina expert, but will be less obvious for readers who are not familiar with the distinct  
357 labels of retinal neurons.

358  
359 This has been done.

360  
361 12. Line 290: how do you know that they are EdU-positive neurons and not EdU-  
362 positive cells?

363  
364 As stated in Figures 1 and S1 and S2 we have stained for markers for Muller glia and  
365 microglia, and observe little EdU incorporation, while we observe extensive EdU  
366 incorporation in rods, cones, and HuC/D-positive amacrine and ganglion cells. We  
367 likewise do not observe substantial numbers of any other non-neuronal cell type in our



368 [scRNA-Seq or snRNA/ATAC-Seq analysis. We therefore feel confident in referring to](#)  
369 [these as overwhelmingly EdU-positive neurons in this case.](#)

370  
371 13. Line 304 appears to be redundant (“in the production of the generation...”).

372  
373 [This has been corrected.](#)

374  
375 14. Line 306: the authors may want to revise the sentence. The way it is written it  
376 suggests that these “initial factors” inhibit the function of inner neurons, whereas they  
377 might inhibit the generation of inner neurons.

378  
379 [This has been corrected.](#)

380  
381 15. Lines 344-346: this information is not easily accessible in the current table format. In  
382 general, I suggest to revise the nomenclature of the tables (ST3, ST4...), because in the  
383 current manuscript version each “table” corresponds to an Excel file containing, in fact,  
384 several tables.

385  
386 [We now specifically cite these files as Supplemental Datasets rather than Tables to](#)  
387 [reduce confusion, and also specifically cite relevant tabs within the datasets in the](#)  
388 [following format: Supplemental Dataset X, T\(ab\) Y.](#)

389  
390 16. Line 350: Figure S3 is actually a general overview, and does not specifically refer to  
391 microglia only. Also, not all the microglia markers listed in the text are visible in the cited  
392 Figure S3, only mpeg1.1.

393  
394 [We now include a reference to Supplemental Dataset 5, which lists the full complement](#)  
395 [of microglial markers.](#)

396  
397  
398 17. It is not clear why the authors sequenced the whole embryo heads (line 366) –  
399 please explain.

400  
401 [Prior to 36 hpf, it was simply not possible to cleanly dissect retinas. This is now](#)  
402 [explained in the text.](#)

403  
404  
405 Reviewer #3 (Remarks to the Author):

406  
407 In the manuscript, the authors investigated the molecular process of retina regeneration  
408 in zebrafish in both light damage and NMDA models at single cell resolution. By  
409 comparing the two damage models and normal development process, the authors  
410 observed that the regeneration process is similar but distinct between the two damage  
411 models and also distinct from normal development process. In addition, the impact of  
412 two key factors, Mmp9 and foxj1a, on the regeneration have been examined. The  
413 results suggest that Mmp9 plays an important role in repressing regeneration of AC and

414 RGC. In addition, knock down of Foxj1a reduces the number of regenerative neurons. I  
415 would like to congratulate the authors for generating such a significant resource and the  
416 new insights of the molecular process of retina regeneration in zebrafish. The design of  
417 the study is very thorough, and the manuscript is well written.

418

419 We thank the Reviewer for his/her positive assessment of the manuscript.

420

421 My specific comments are the following:

422 1. No regeneration of horizontal cells are observed in this study. I am wondering if this is  
423 due to no degeneration of horizontal cell in the LD and NMDA damage model.

424

425 While we observe no evidence for injury-induced loss of horizontal cells in either injury  
426 model, we lack a cell specific marker to label them, so it is only based on their unique  
427 location (which shifts upon the loss of the ONL) and their morphology. Following injury,  
428 it is often not straightforward to distinguish horizontal cells because of interkinetic  
429 nuclear migration of MGPC nuclei, which enter the OPL and obscure the horizontal  
430 cells. We do not observe evidence for immature MGPC-derived horizontal cell  
431 precursors at any timepoint in either injury model. It is likely that selective ablation of  
432 horizontal cells using techniques such as cell-specific NTR transgenic lines would  
433 indeed lead to selective horizontal cell regeneration. Whether this would also lead to  
434 indirect death and regeneration of photoreceptors and AC/RGC is an interesting topic  
435 for future research.

436

437 2. Does Mmp9 affect the normal development of the retina? Is higher AC/RGC to  
438 photoreceptor ratio observed in the Mmp9 mutant?

439

440 We now quantify the relative ratio of HuC/D-positive AC/RGC relative to total DAPI-  
441 positive cells and DAPI-positive ONL cells in control samples for both wildtype and  
442 mmp9-deficient fish. We do not observe any changes in the relative ratio of AC/RGC to  
443 photoreceptors. This is included below as Reviewer Figure 1:

444

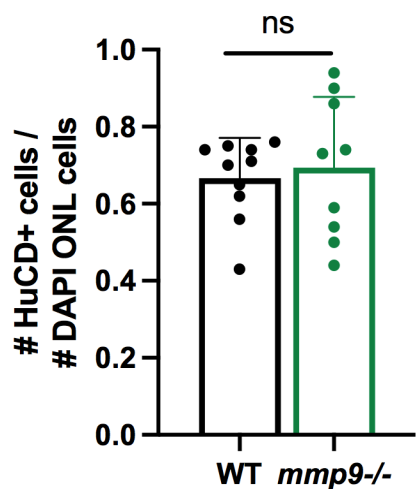

445



446 **Reviewer Figure 1:** The ratio of the total number of HuC/D and DAPI-positive inner  
447 retinal neurons to the total number of DAPI-positive ONL cells is shown for wildtype and  
448 *mmp9*-deficient adult retina. Each point represents data from a single animal.  
449

450 3. It seems that MG activation is faster in the LD model than the NMDA model.  
451 Furthermore, given the heterogeneity of MG and derived cells in any given time points,  
452 it might be useful to try to take this into account by calculating and correcting  
453 pseudotime during DEG and DAR analysis to exclude DEGs between two models due  
454 to phase shift.  
455

456 We thank the reviewer for this suggestion. In the differential analysis (Figure 2G) of  
457 Rest MG, Act MG, and MGPCs, we did not utilize pseudotime to identify DEGs and  
458 DARs; instead, to eliminate the phase shift effect, we used combined cells from all time  
459 points within a single cell type to call DEGs and DARs. Pseudotime (Figure 2B) was  
460 only employed for visualizing and clustering DEGs and DARs. This methodology is now  
461 detailed in the methods section.  
462

463 4. "When examining the MG-to-MGPC branch across the two damage models,  
464 noticeable similarities are present. However, unique DEGs and DARs exist between  
465 them. The LD model exhibits a heightened neurogenic signal, while the NMDA model  
466 emphasizes a more robust inflammatory response pathway. From these observations,  
467 the authors suggest a hypothesis: MGPCs from these two damage models are in  
468 unique states, leading to varying proportions of retinal neurons being produced. Yet, this  
469 difference might merely be a reflection of environmental variations due to different cell  
470 type degenerations, rather than distinct MG regeneration pathway's choice. How can we  
471 differentiate between these two models?  
472

473 It is undoubtedly true that extrinsic factors that are differentially induced by LD vs.  
474 NMDA injury control the formation of fate-biased MGPCs. The text has been revised to  
475 make this point explicitly clear.  
476

477 5. During typical development, the cell type that a progenitor cell differentiates into is  
478 predominantly governed intrinsically. In the context of regeneration, MGPCs  
479 differentiate into cell types degenerated. How might MGPCs detect environmental cues  
480 and make corresponding differentiation choices? Could the author provide some  
481 speculation on this?  
482

483 A broad range of extrinsic cues could potentially signal to MGPCs to confer fate biases.  
484 These might include signals differentially released by dying neurons, signals  
485 differentially released from MG or microglia, the loss of contact-dependents signals from  
486 the dying neurons to MG, etc. This is now discussed in the text.  
487

488 6. Based on the data, is *foxj1a* required for MG activation or subsequent MGPC  
489 proliferation and differentiation?  
490

491 This is a good question, and difficult to address without a systematic analysis of  
492 molecular markers specific to both activated MG and MGPCs using techniques such as  
493 scRNA-Seq. We plan to investigate this in future studies.

494  
495 7. Considering the extensive and complex dataset presented, a summarizing model  
496 figure highlighting the key findings at the end would be beneficial.

497  
498 A schematic summarizing the findings is now included as Figure S9.

499  
500 Reviewer #4 comments to the authors:

501  
502 In the present manuscript, Lyu et al. performed single-nuclear and single-cell RNA-seq and  
503 ATAC-Seq of developing and regenerating retinas to investigate the molecular mechanisms  
504 controlling injury-induced neurogenesis. The results indicated that retinal regeneration was  
505 similar to retinal development, but the regeneration process did not precisely recapitulate retinal  
506 development. The authors also displayed the similarities and differences in gene expression  
507 and gene regulatory networks in both retina damage models. In addition, the authors claimed  
508 that mmp9 was a selective inhibitor of amacrine and ganglion cell formation and foxj1a was  
509 essential for injury-induced neurogenesis. Overall, this study depicted the major differences  
510 between gene regulatory networks between retinal regeneration and development.

511  
512 Some comments for consideration for the authors are listed below in hope the authors will find  
513 them useful.

514 1. There are inconsistencies in the content and legends of Figures 1 and 3. For instance, in  
515 Figure 3, the panels C and D in the legend does not present in the actual figure.

516  
517 This has been corrected.

518  
519 2. In Figures 1J and 1L, after NMDA and constant light damage, the lowest cell numbers were  
520 seen at 60 hours in the different three layers. Why do different types of injuries lead to the same  
521 results? Can the authors explain the possible reasons for this result?

522  
523 Both forms of injury are severe, and lead to the loss of the majority of cells directly affected by  
524 the injury in question (photoreceptors following light damage and amacrine/ganglion cells  
525 following NMDA treatment). We do not know why 60 hours represents the peak time for both  
526 direct and indirect neuronal death, although we would predict that if we were to conduct a finer  
527 resolution temporal analysis of cell loss (e.g. sampling every 4 hours between 48 and 72hrs  
528 post-injury), we would observe that the peak of indirect neuronal death (e.g. loss of  
529 amacrine/ganglion cells following light damage) would lag that seen for direct neuronal death.

530  
531 3. "Both Gene Ontology and KEGG pathway analysis identified functional differences in  
532 differentially expressed genes between the two injury conditions", 1791 genes highly expressed  
533 in the light damage, so how many genes were utilized for this analysis? Did the authors check  
534 whether these genes have statistical significance?

535  
536 We identified LD-enriched DEGs between LD and NMDA using the following criteria:  $\log_{2}fc >$   
537  $0.25$  and an adjusted  $p$ -value  $< 0.05$ . We enumerated the number of DEGs for RestMG, ActMG,  
538 and MGPCs separately in the text and table (Supplemental Dataset 3: T5). Before conducting  
539 GO analysis, we combined the DEGs from RestMG, ActMG, and MGPCs and removed  
540 redundant genes. From this, we obtained 890 and 571 non-overlapping genes enriched in LD or

541 NMDA, respectively. These genes were re-clustered based on their expression profile along the  
542 trajectory. Subsequently, GO and KEGG analyses were conducted for each cluster of genes.  
543 We've revised the text, tables, and Methods sections to clarify this.

544  
545 4. For scRNA-seq or multi-omics data, expression of marker genes of individual cell types was  
546 not shown, which make it impossible to validate the cell type annotation.

547  
548 Marker genes for each cell cluster are shown on the x-axis of Figure S3D, demonstrating the  
549 accuracy of cell type annotation. Also, a list of all the marker genes that are selectively  
550 expressed in each cell type is now included in Supplemental Dataset 5.

551  
552 5. The authors utilized CCA (canonical correlation analysis) to integrate the single cell RNA-seq  
553 data and single nuclear RNA-seq data, during the process of data integration, did the authors  
554 observe any differences from the two different sequencing methods? Are there variations in the  
555 genes detected through each sequencing approach?

556  
557 We appreciate the reviewer's question. In this paper, the injury or development samples  
558 from different sequencing methods are processed and analyzed separately. We only  
559 used CCA to integrate the datasets which derived from the same sequencing method  
560 (Figure 2A, 5A, snRNA-seq). Our group has systematically investigated both cell  
561 representation and gene expression patterns in scRNA- and snRNA-Seq datasets  
562 prepared from the same starting material (Santiago et al. 2023). In this study, which  
563 closely reflects our findings in the current study, we found that while both methods can  
564 accurately profile gene expression in major retina cell types, but also observed  
565 differences in cell type proportions captured by snRNA-seq and scRNA-seq.  
566 Specifically, single-cell RNA sequencing overrepresented Müller glia and microglia, but  
567 captured fewer amacrine and retinal ganglion cells (Fig S4A). Cell type-specific scRNA-  
568 Seq profiles generally show higher levels of cross-contamination with transcripts  
569 enriched in other cell types. This is especially so for photoreceptor-specific markers,  
570 which frequently contaminate other cell types in scRNA-Seq datasets, but do so much  
571 less in snRNA-Seq datasets. The number of transcripts and genes detected in scRNA-  
572 Seq samples, as expected, considerably higher than observed with snRNA-seq analysis  
573 of the same cell types. Finally, scRNA-Seq data is significantly enriched for genes  
574 encoding ribosomal proteins, while snRNA-Seq data is enriched for RNA-binding  
575 proteins.

576  
577 We hope that these changes have addressed any outstanding concerns, and look  
578 forward to hearing your response to the revised manuscript.

579  
580

## 581 **References cited:**

- 582 Emerson, Mark M., Natalia Surzenko, Jillian J. Goetz, Jeffrey Trimarchi, and Constance L. Cepko. 2013.  
583 "Otx2 and Onecut1 Promote the Fates of Cone Photoreceptors and Horizontal Cells and Repress  
584 Rod Photoreceptors." *Developmental Cell* 26 (1): 59–72.
- 585 Lahne, Manuela, and David R. Hyde. 2016. "Interkinetic Nuclear Migration in the Regenerating Retina."  
586 *Advances in Experimental Medicine and Biology* 854: 587–93.
- 587 Lonfat, Nicolas, Su Wang, Changhee Lee, Mauricio Garcia, Jiho Choi, Peter J. Park, and Connie Cepko.

588 2021. "Cis-Regulatory Dissection of Cone Development Reveals a Broad Role for Otx2 and Oc  
589 Transcription Factors." *Development* 148 (9). <https://doi.org/10.1242/dev.198549>.  
590 Santiago, Clayton P., Megan Y. Gimmen, Yuchen Lu, Minda M. McNally, Leighton H. Duncan, Tyler J.  
591 Creamer, Linda D. Orzolek, Seth Blackshaw, and Mandeep S. Singh. 2023. "Comparative Analysis of  
592 Single-Cell and Single-Nucleus RNA-Sequencing in a Rabbit Model of Retinal Detachment-Related  
593 Proliferative Vitreoretinopathy." *Ophthalmology Science* 3 (4): 100335.

## **REVIEWERS' COMMENTS**

### **Reviewer #1 (Remarks to the Author):**

The authors have carefully considered my comments and answered most. The added specifications, discussions and figure S9 significantly aid the understanding of the complex results.

I still think an experimental validation of the II1beta hypothesis would have strengthened the manuscript, but I am looking forward to these results in a follow up manuscript.

### **Reviewer #2 (Remarks to the Author):**

The authors have substantially revised the ms along the lines suggested by the reviewers. They have convincingly addressed all the points that I have raised and fixed the various smaller issues, and the revised version of the ms is therefore now fine in my opinion. Congratulations on a nice piece of work !

### **Reviewer #3 (Remarks to the Author):**

The author had adequately addressed issues and questions raised by the reviewers by modifying/correcting the text and add additional supplement figures. The study is well designed and clearly written. I believe the manuscript is ready to be accepted for publications.

### **Reviewer #4 (Remarks to the Author):**

The authors addressed all my concerns, no further question.
