# Supplementary material for: Common and divergent gene regulatory networks control injury-induced and developmental neurogenesis in zebrafish retina
Source: PubMed Central journal article supplement (PMC10733277; doi:10.1038/s41467-023-44142-w), 2023-12-20
Supplement: 41467_2023_44142_MOESM3_ESM.pdf [file 41467_2023_44142_MOESM3_ESM.pdf]

## Description of Additional Supplementary Files

**Supplemental Dataset 1:** snRNA/ATAC-Seq and scRNA-Seq data for LD and NMDA samples.

**Supplemental Dataset 2:** Genes, peaks, and motifs selectively enriched in LD vs. NMDA samples (snRNA/ATAC-Seq+scRNA-Seq).

**Supplemental Dataset 3:** Regulatory relationships among TFs selectively active in LD vs. NMDA samples.

**Supplemental Dataset 4:** Genes selectively expressed in each of major retinal cell type in snRNA-seq and scRNA-Seq injury datasets.

**Supplemental Dataset 5:** snRNA/ATAC-Seq and reanalyzed scRNA-Seq data for developing retinal samples.

**Supplemental Dataset 6:** Genes, peaks, and motifs selectively enriched in injury vs. development samples (snRNA/ATAC-Seq+scRNA-Seq).

**Supplemental Dataset 7:** Regulatory relationships among TFs selectively active in injury vs. development samples.
